# Supplementary material for: Common-mode signals and vertical velocities in the greater Alpine area from GNSS data
Source: Copernicus journal article supplement (doi:10.5194/se-13-1541-2022), 2022-10-11
Supplement: Supplementary file 1 [file se-13-1541-2022-supplement.pdf]

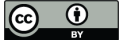

*Supplement of*

## **Common-mode signals and vertical velocities in the greater Alpine area from GNSS data**

**Francesco Pintori et al.**

*Correspondence to:* Francesco Pintori ([francesco.pintori@ingv.it](mailto:francesco.pintori@ingv.it))

The copyright of individual parts of the supplement might differ from the article licence.

## **S1. GPS processing**

We use the GAMIT/GLOBK (Herring et al., 2018) software, and for this work in particular its 10.71 version, to analyze Global Positioning System (GPS) observations from the continuous GNSS stations shown in Fig. 1. The processing scheme is mainly based on three different steps: 1) GPS phase reduction and generation of loosely-constrained sub-network solutions, 2) combination of the daily sub-networks solutions and realization of positions in specific reference frames and 3) the time-series analysis.

Step 1 is performed using the GAMIT module of the GAMIT/GLOBK software. First, the whole RINEX dataset available each day in the archive is subdivided into smaller sub-networks, each consisting of 40 stations, plus an additional network of tie-stations (including at least one site in common with all clusters) and a cluster including all the IGB14 core sites available in the study region. Processing is conducted independently for each day and for each subnetwork. The GAMIT software uses an ionosphere-free linear combination of GPS phase observables by applying a double differencing technique to eliminate phase biases related to drifts in the satellite and receiver clock oscillators. GPS phase data are weighted according to an elevation-angle-dependent error model (Herring et al., 2018) using an iterative analysis procedure whereby the elevation dependence was determined by the observed scatter of phase residuals. In this analysis the parameters of satellite orbit are fixed to the IGS final values. IGS absolute antenna phase center models (igs14\_www.atx, available at [ftp://chandler.mit.edu/updates/source/incremental\\_updates/tables](ftp://chandler.mit.edu/updates/source/incremental_updates/tables)) for both satellite and ground-based antennas is adopted in order to improve the accuracy of vertical site position component estimations. The first-order ionospheric delay is eliminated by using the ionosphere-free linear combination, while second-order ionospheric corrections (Petrie et al., 2010) is applied using the IONEX files from the Center for Orbit Determination in Europe (CODE). The tropospheric delay is modeled as a piecewise linear model and estimated using the Vienna Mapping Function 1 (VMF1, Boehm et al., 2007) with a 10° cutoff. We use the Global Pressure and Temperature 2 (GPT2) model to provide a priori hydrostatic delays. The Earth Orientation Parameters (EOP) were tightly constrained to priori values obtained from IERS Bulletin B. The ocean tidal loading was corrected using the FES2004 model (Lyard et al., 2006).

The daily, loosely constrained, solutions of the daily sub-networks, plus the tie-network and the IGB14-core sites network, are combined using the GLOBK software, which adopts a Kalman filter estimation algorithm, simultaneously realizing a global reference frame by applying generalized constraints (Dong et al. 1998). Specifically, we define the reference frame by minimizing the velocities of the IGB14 core stations, augmented by a set of high-quality IGS stations (<http://igscb.jpl.nasa.gov>, accessed on 6 January 2021), while estimating a seven-parameter transformation with respect to the GPS realization of the ITRF2014 frame, i.e., the IGB14 reference frame (Fig. S1).

In the third step the displacement time-series are analyzed in order to estimate offsets due to instrumental changes, as documented by site logs or by visual inspections, all other signals known to be largely present in GPS time series (e.g., linear trend, seasonal signals, transient signals) are left and analyzed with the vbICA.

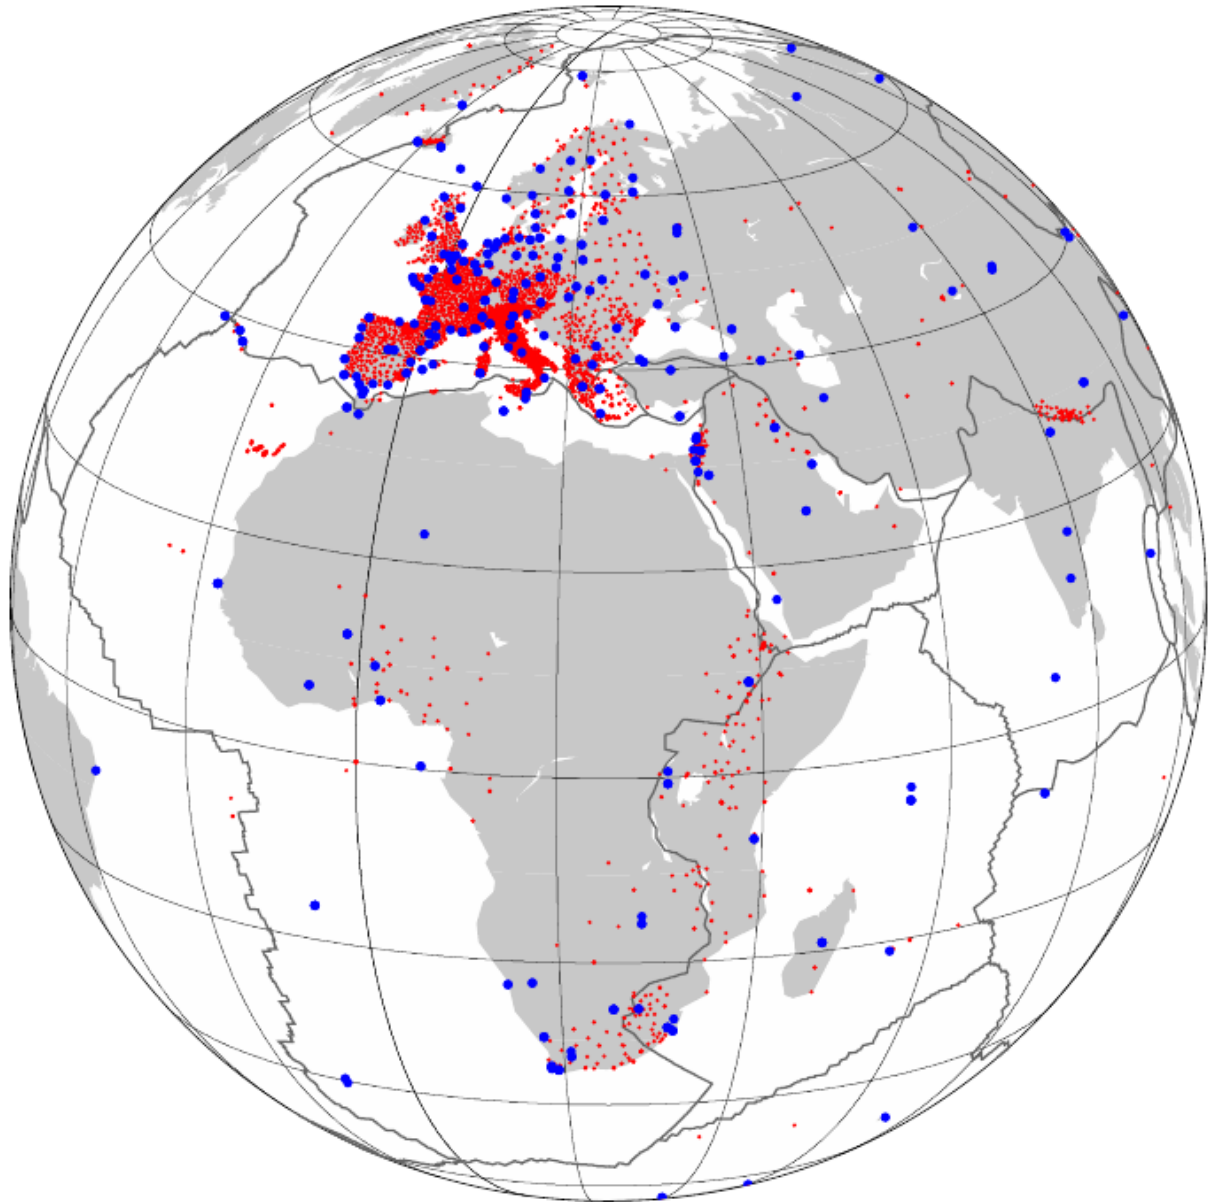

**Figure S1.** Distribution of the continuous GNSS stations analyzed (red dots). The blue circles show the sites used to define the reference frame, including all IGS14 core sites, integrated by additional, high-quality, IGS stations.

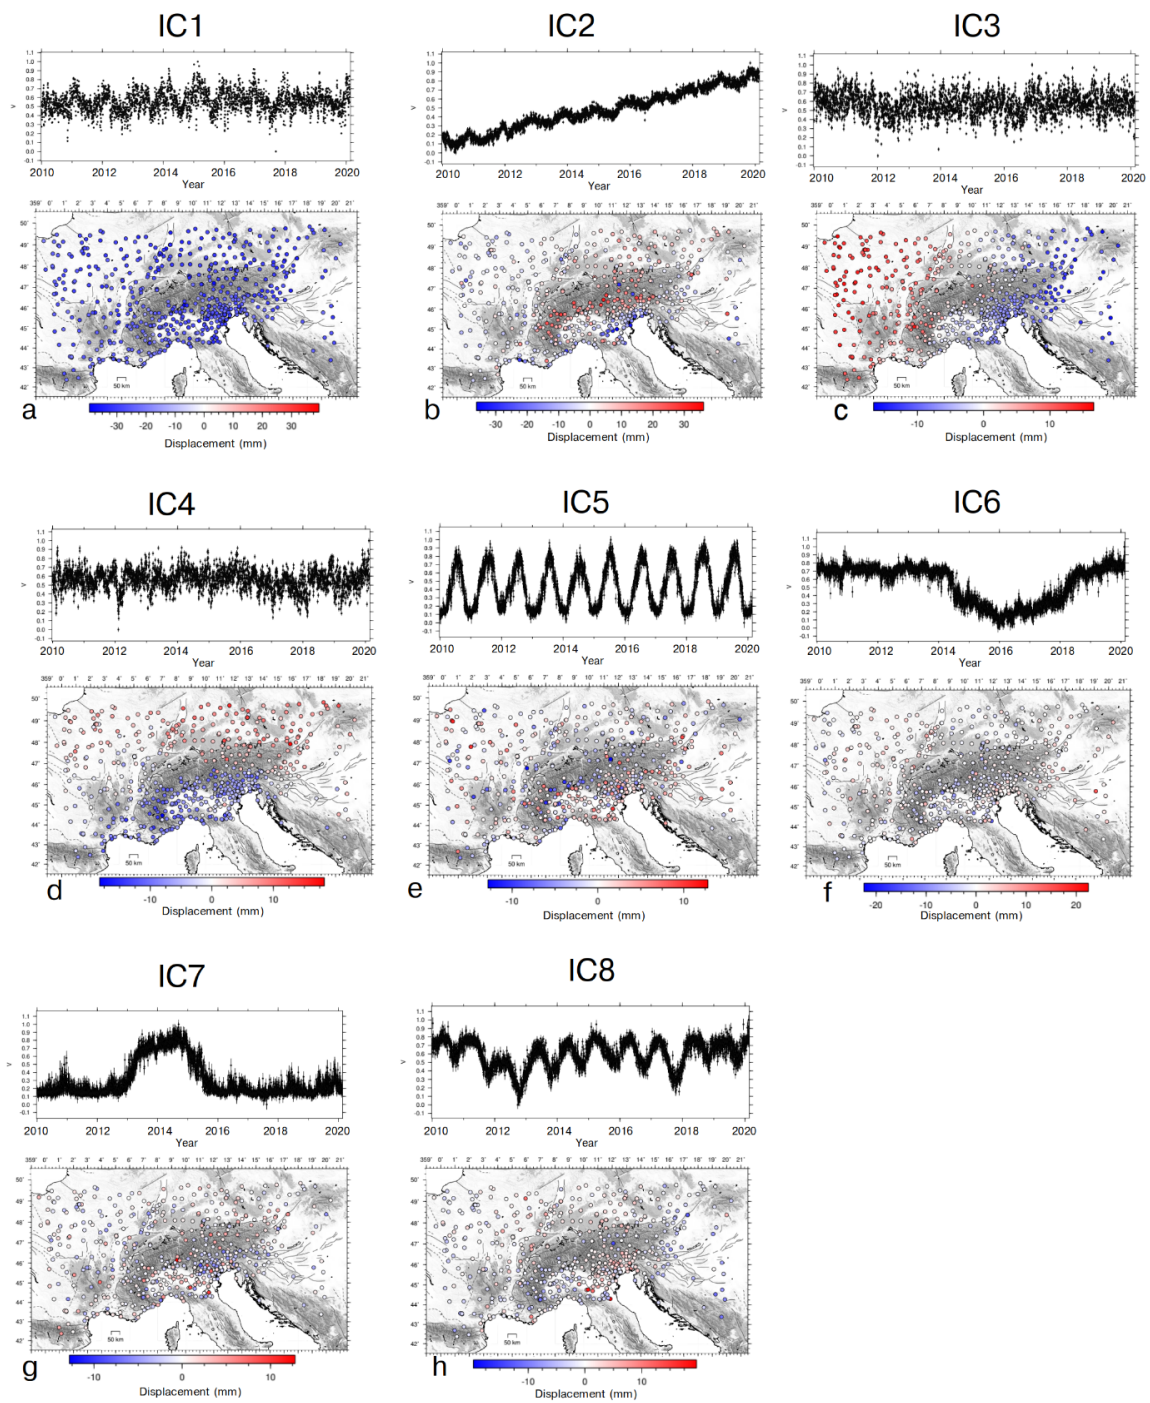

**Figure S2. Temporal evolution and spatial response of: a) IC1; b) IC2; c) IC3; d) IC4; e) IC5; f) IC6; g) IC7 of the GNSS decomposition. The linear trend is not removed from the time series.**



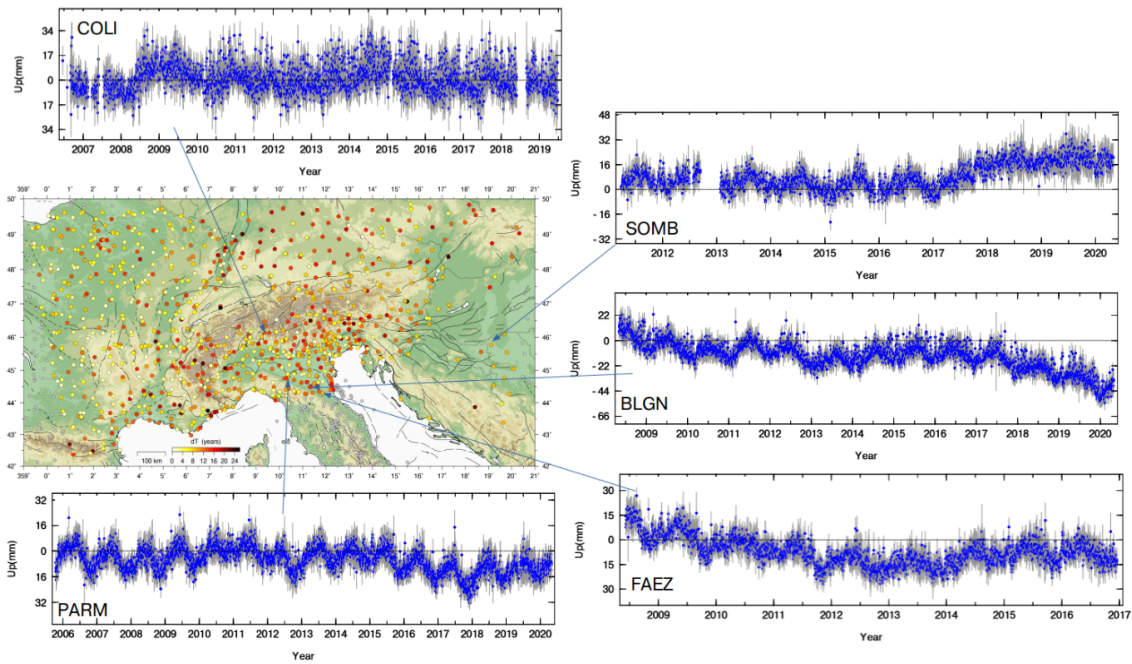

**Figure S3. Temporal evolution of the vertical component of the GNSS stations most affected by IC5 (BLGN, FAEZ, SOMB); IC6 (FAEZ, PARM) and IC7 (COLI, PARM).**

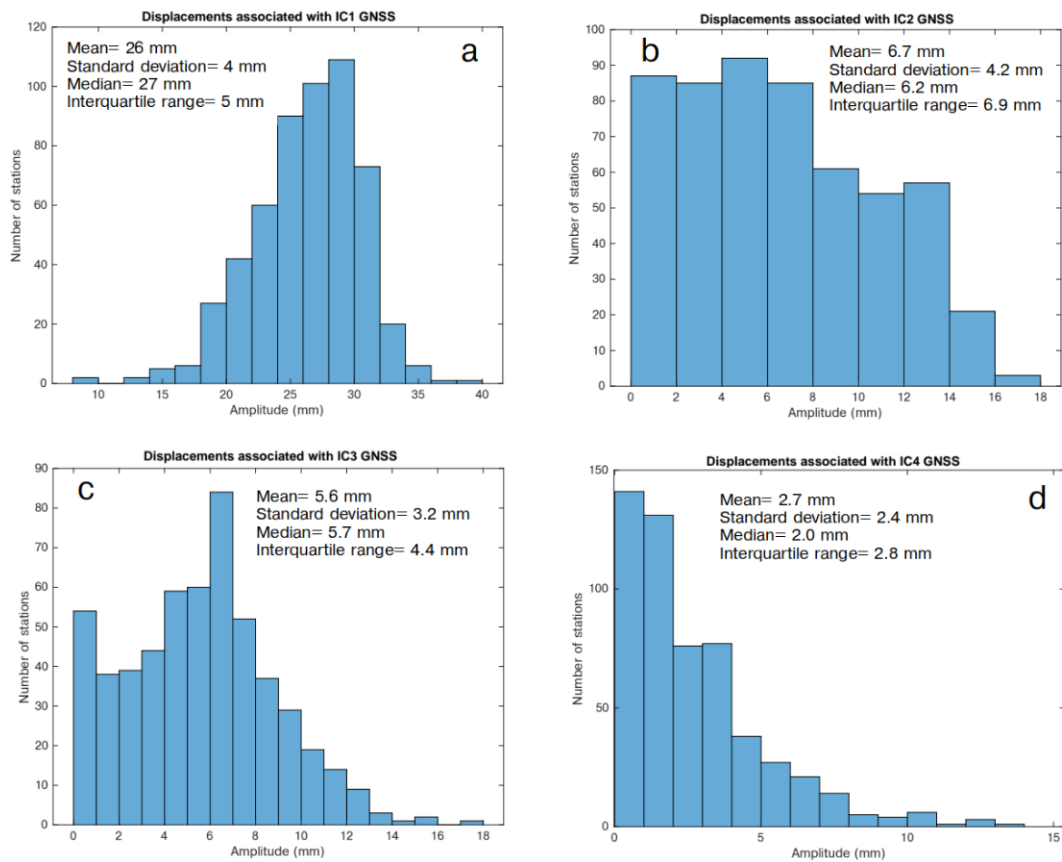

**Figure S4. Histogram of the maximum displacements associated with IC1 (a); IC2 (b); IC3 (c); IC4 (d) of the GNSS decomposition.**

| Dataset   | IC1 mean | IC2 mean | IC3 mean | IC4 mean | IC1 median | IC2 median | IC3 median | IC4 median |
|-----------|----------|----------|----------|----------|------------|------------|------------|------------|
| GNSS      | 26 mm    | 6.7 mm   | 5.6 mm   | 2.7 mm   | 27 mm      | 6.2 mm     | 5.7 mm     | 2.0 mm     |
| NTAL      | 25 mm    | 4.3 mm   | 2.5 mm   | /        | 25 mm      | 3.6 mm     | 2.6 mm     | /          |
| HYDL      | 12.2 mm  | 1.7 mm   | 2.1 mm   | /        | 12.5 mm    | 1.3 mm     | 2.1 mm     | /          |
| NTAL+HYDL | 25 mm    | 5.1 mm   | 3.8 mm   | /        | 26 mm      | 4.0 mm     | 3.8 mm     | /          |

**Table S1a.** Mean and median amplitude of the maximum displacements associated with the ICs of the investigated datasets.

| Dataset   | IC1 std | IC2 std | IC3 std | IC4 std | IC1 iqr | IC2 iqr | IC3 iqr | IC4 iqr |
|-----------|---------|---------|---------|---------|---------|---------|---------|---------|
| GNSS      | 4.2 mm  | 4.2 mm  | 3.2 mm  | 2.4 mm  | 5.4 mm  | 6.9 mm  | 4.4 mm  | 2.8 mm  |
| NTAL      | 3 mm    | 2.9 mm  | 1.3 mm  | /       | 3 mm    | 4.3 mm  | 1.7 mm  | /       |
| HYDL      | 1.4 mm  | 1.3 mm  | 1.1 mm  | /       | 1.2 mm  | 2.1 mm  | 1.5 mm  | /       |
| NTAL+HYDL | 3 mm    | 3.5 mm  | 1.8 mm  | /       | 4 mm    | 5.2 mm  | 2.7 mm  | /       |

**Table S1b.** Standard deviation and interquartile range of the amplitude of the maximum displacements associated with the ICs of the investigated datasets.

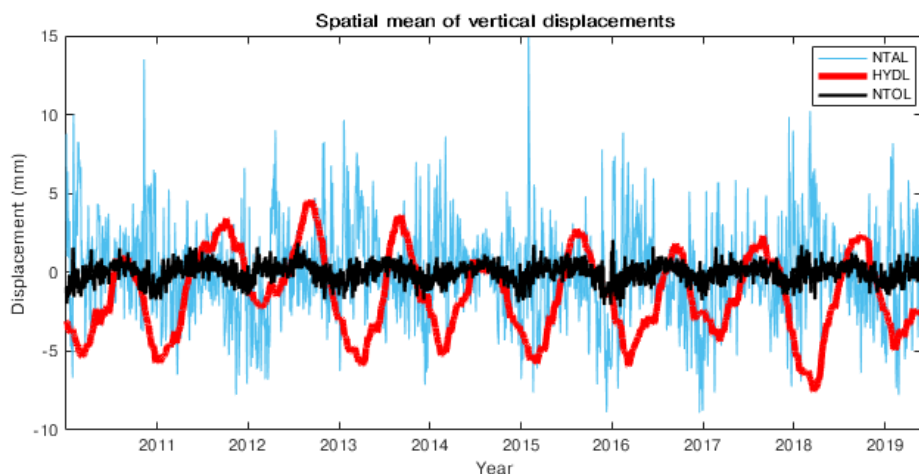

**Figure S5.** Spatial mean of the displacements associated with the non-tidal atmospheric (blue); hydrological (red); and non-tidal ocean (black) loading, computed using the datasets provided by LSDM (<http://rz-vm115.gfz-potsdam.de:8080/repository>), which are named NTAL, HYDL and NTOL.

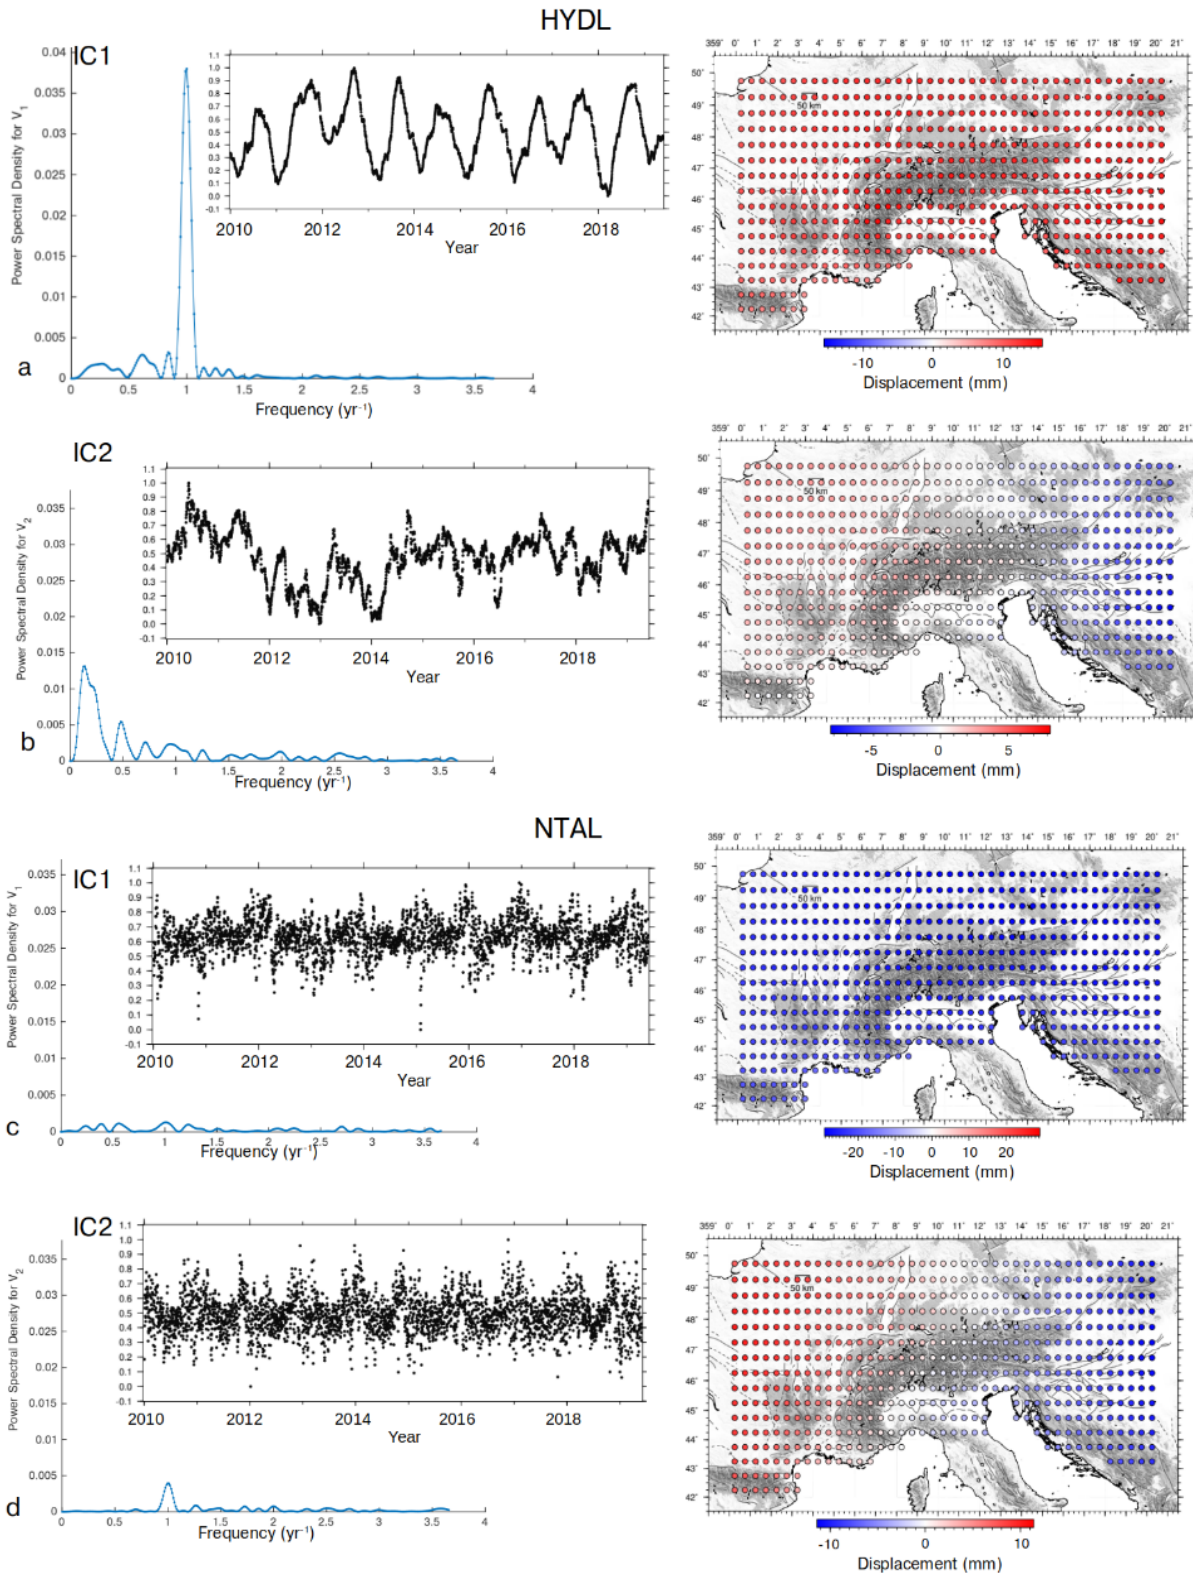

Figure S6. Temporal evolution, power spectral density and spatial response of: a) IC1; b) IC2 of the HYDL dataset, using a 2-component decomposition. c); d) are the same for the NTAL dataset, using a 2-component decomposition.

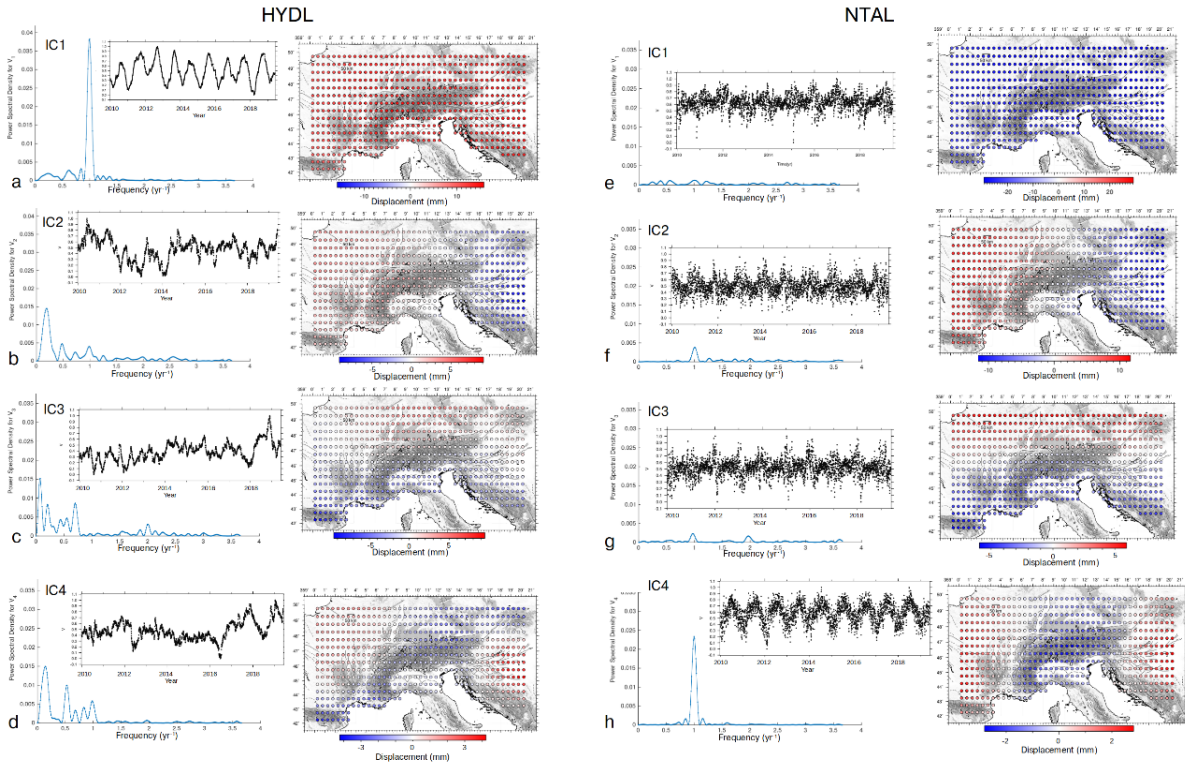

**Figure S7. Temporal evolution, power spectral density and spatial response of: a) IC1; b) IC2; c) IC3; d) IC4 of the HYDL dataset, using a 4-component decomposition. e); f); g); h) are the same for the NTAL dataset, using a 4-component decomposition.**



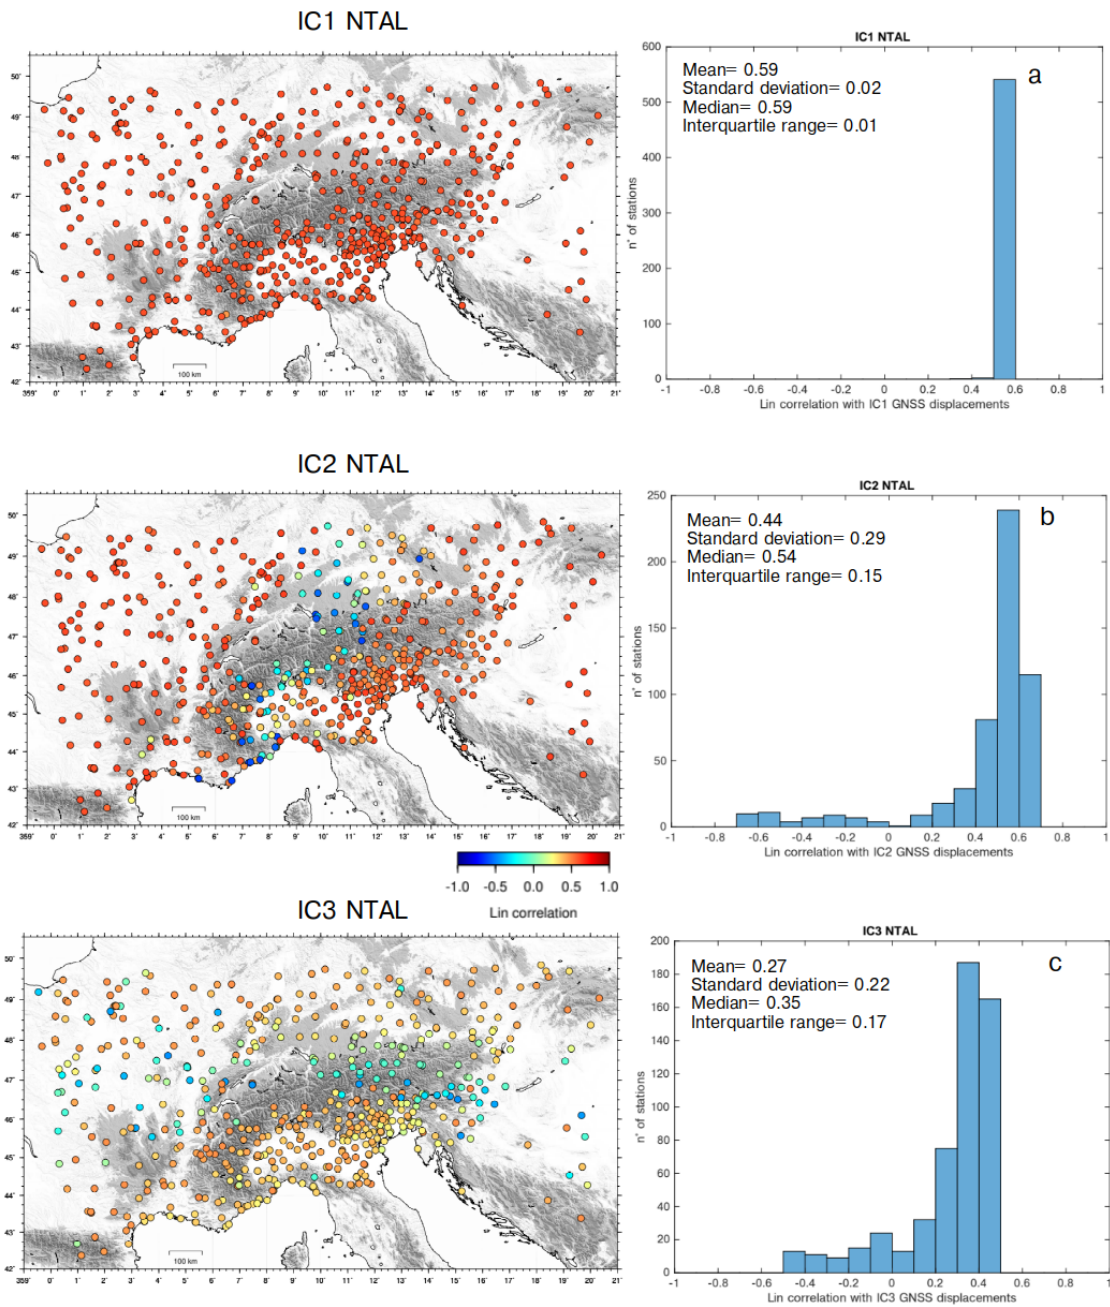

Figure S8. Lin correlation coefficients between: a) GNSS-IC1 and NTAL\_IC1; b) GNSS\_IC2 and NTAL\_IC2; c) GNSS-IC3 and NTAL\_IC3. Histograms of the correlation coefficients are also reported.

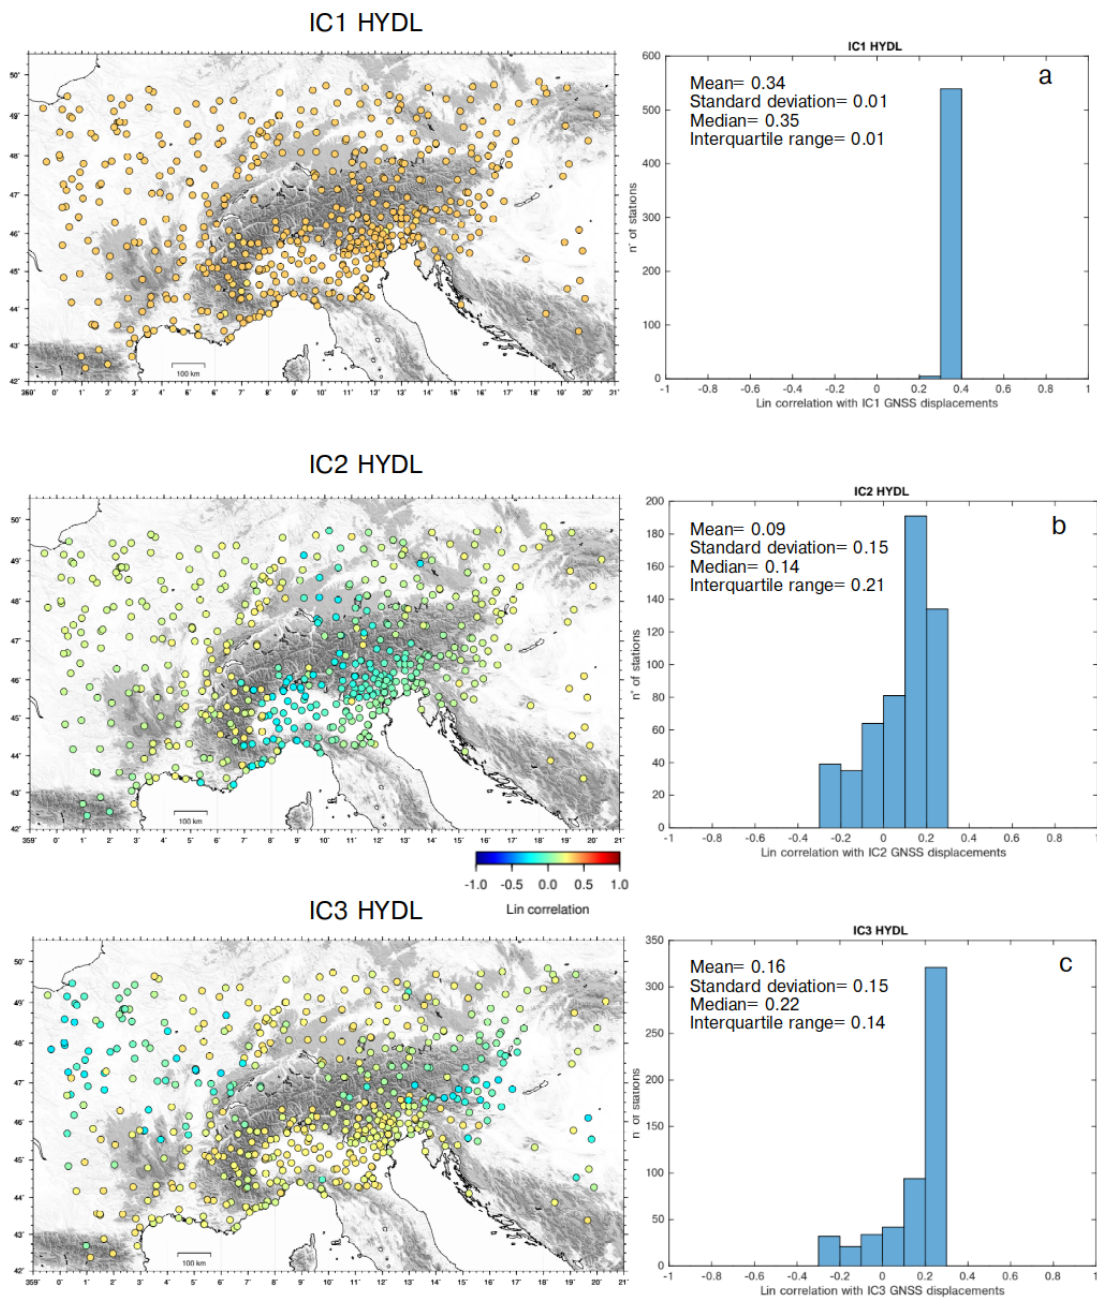

Figure S9. Lin correlation coefficients between: a) GNSS-IC1 and HYDL\_IC1; b) GNSS\_IC2 and HYDL\_IC2; c) GNSS-IC3 and HYDL\_IC3. Histograms of the correlation coefficients are also reported. The uncertainty associated with the mean values is  $1\sigma$ , while the uncertainty associated with the median values is the interquartile range.

## S2. Analysis of the EOST dataset and its relation with the GNSS data

In section 4.2 we interpret the GNSS displacements associated with IC1, IC2 and IC3 as induced by the combined effect of the atmospheric and hydrological loading. In that section we used the LSDM dataset as reference, here we use the EOST one.

We repeat the same workflow, performing a vbICA on the displacements associated with the atmospheric loading (ATMIB) and the hydrological loading (HYDRO). Both the temporal evolution and the spatial distribution of the ICs (Fig. S10 and S11) are very similar to the ones extracted from the EOST dataset (Fig. 4, 5).

As a consequence, the Lin correlation between the displacements of the combined ATMIB+HYDRO datasets and the GNSS ones (Fig. S12) is slightly higher than what we show in the main text (Fig. 7).

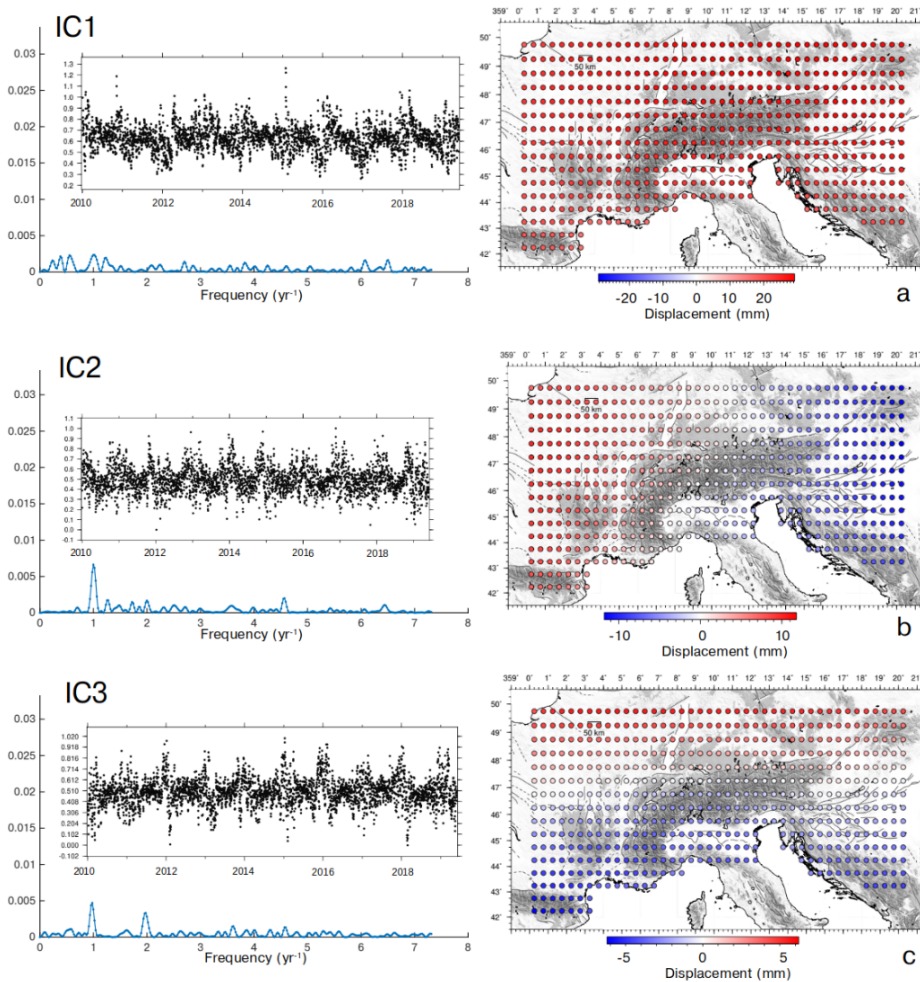

Figure S10. Temporal evolution, power spectral density and spatial response of IC1, IC2, IC3 of the ATMIB dataset.



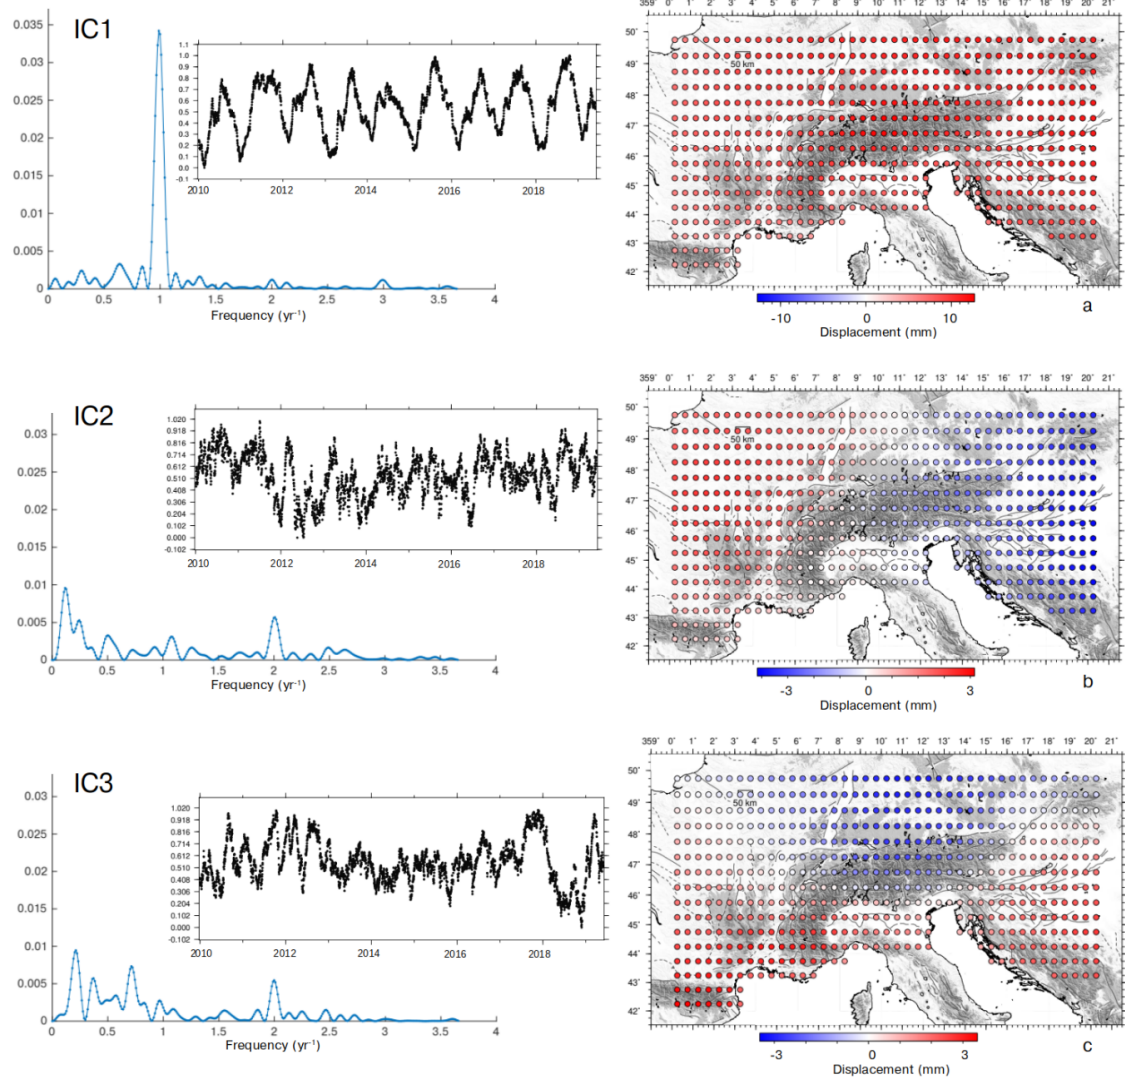

Figure S11. Temporal evolution, power spectral density and spatial response of IC1, IC2, IC3 of the HYDRO dataset.

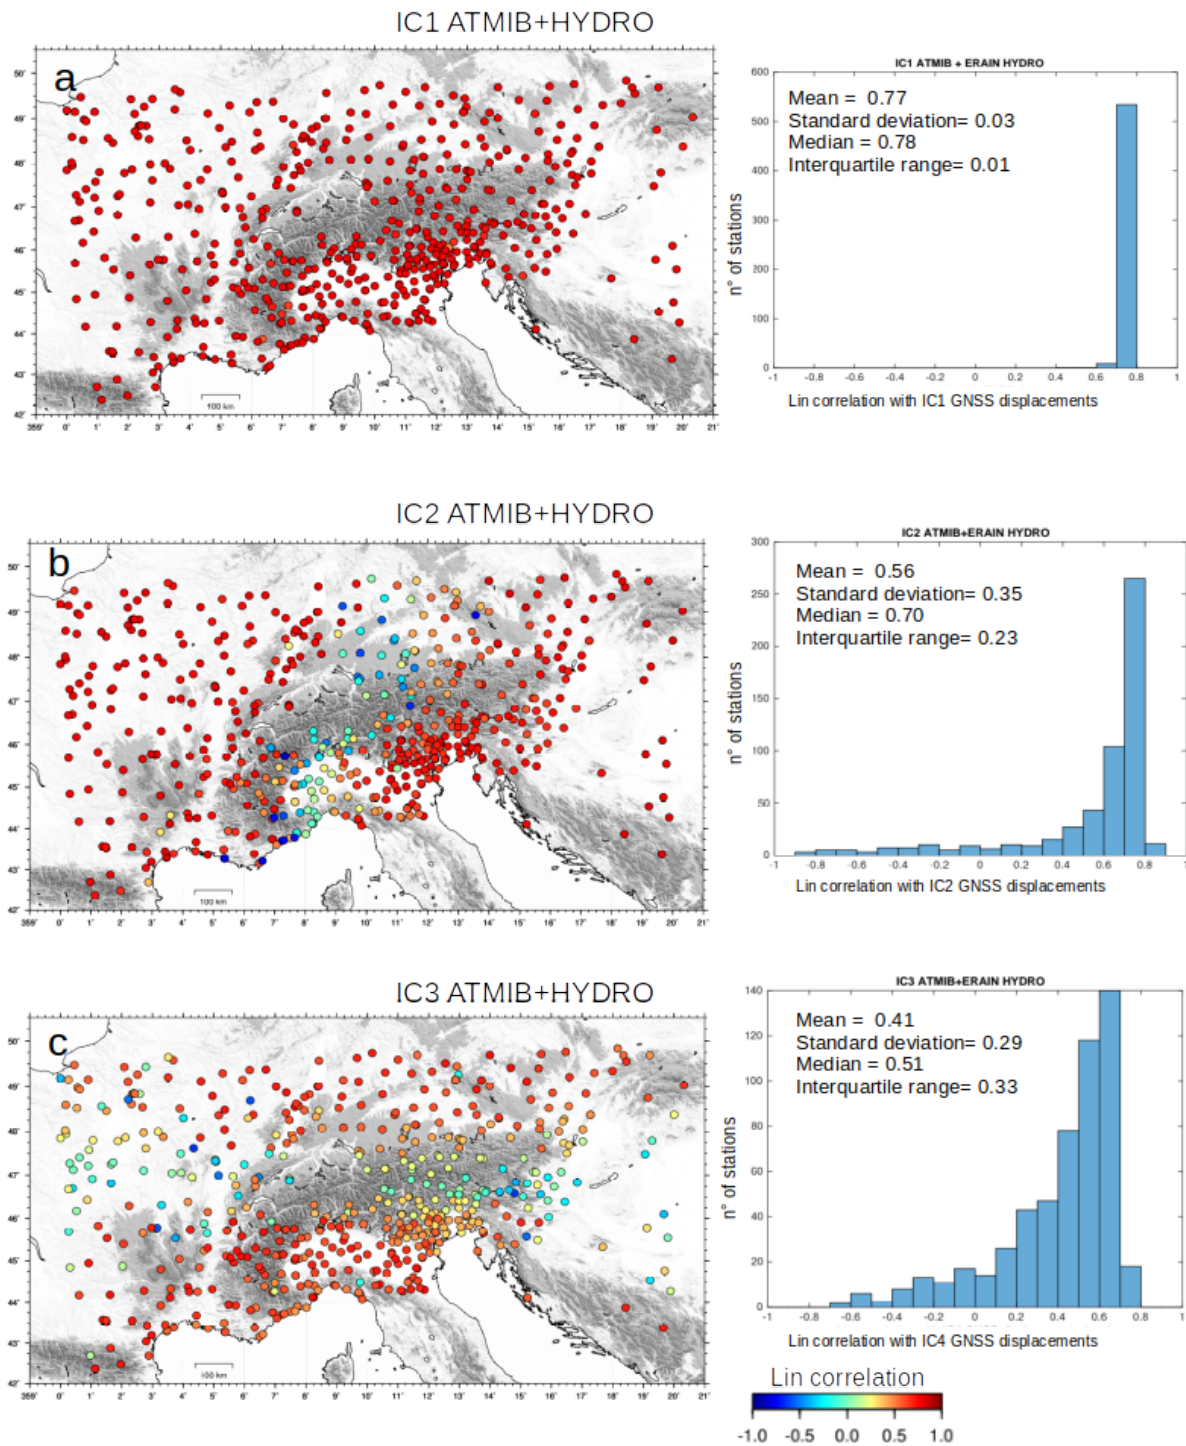

Figure S12. Lin correlation coefficients between: a) GNSS-IC1 and ATMIB+HYDRO\_IC1; b) GNSS\_IC2 and ATMIB+HYDRO\_IC2; c) GNSS-IC3 and ATMIB+HYDRO\_IC3. Histograms of the correlation coefficients are also reported.

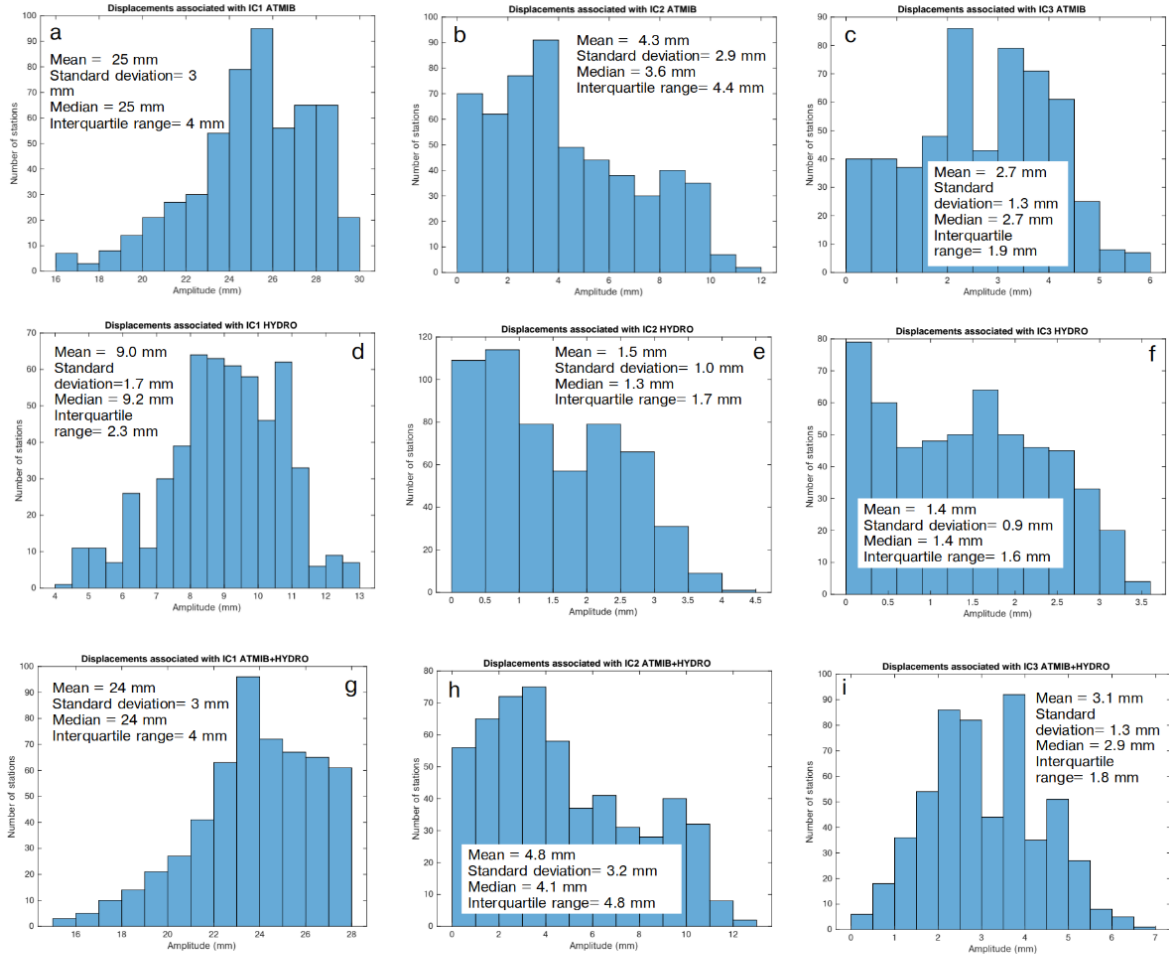

**Figure S13. Histogram of the maximum displacements associated with IC1\_ATMIB (a); IC2\_ATMIB (b); IC3\_ATMIB (c); IC1\_HYDRO (d); IC2\_HYDRO (e); IC3\_HYDRO (f); IC1\_ATMIB+HYDRO (g); IC2\_ATMIB+HYDRO (h); IC3\_ATMIB+HYDRO (i). The uncertainty associated with the mean values is  $1\sigma$ , while the uncertainty associated with the median values is the interquartile range.**

### S3. Analysis of the IC5, IC6, IC7

The last three components resulting from the vbICA analysis on the detrended displacement time-series (Figure S14) appear to be associated with more localized phenomena (monument instabilities or local hydrology). IC5 and IC7, in particular, are associated with a few stations whose trend of subsidence/uplift is not constant in time (COLI, PARM, BLGN, FAEZ, SOMB, which are plotted in Fig. S3). This is due to the presence of non-linear signals, which are probably caused by some local process that we do not further investigate.

Finally, IC6 is an annual signal whose amplitude is large in particular at two GNSS sites in the Po plain (FAEZ and PARM, Fig. S3), where water withdrawal in industrial areas has been proposed by (Nespoli et al. 2021) to explain the seasonal component represented by IC6.

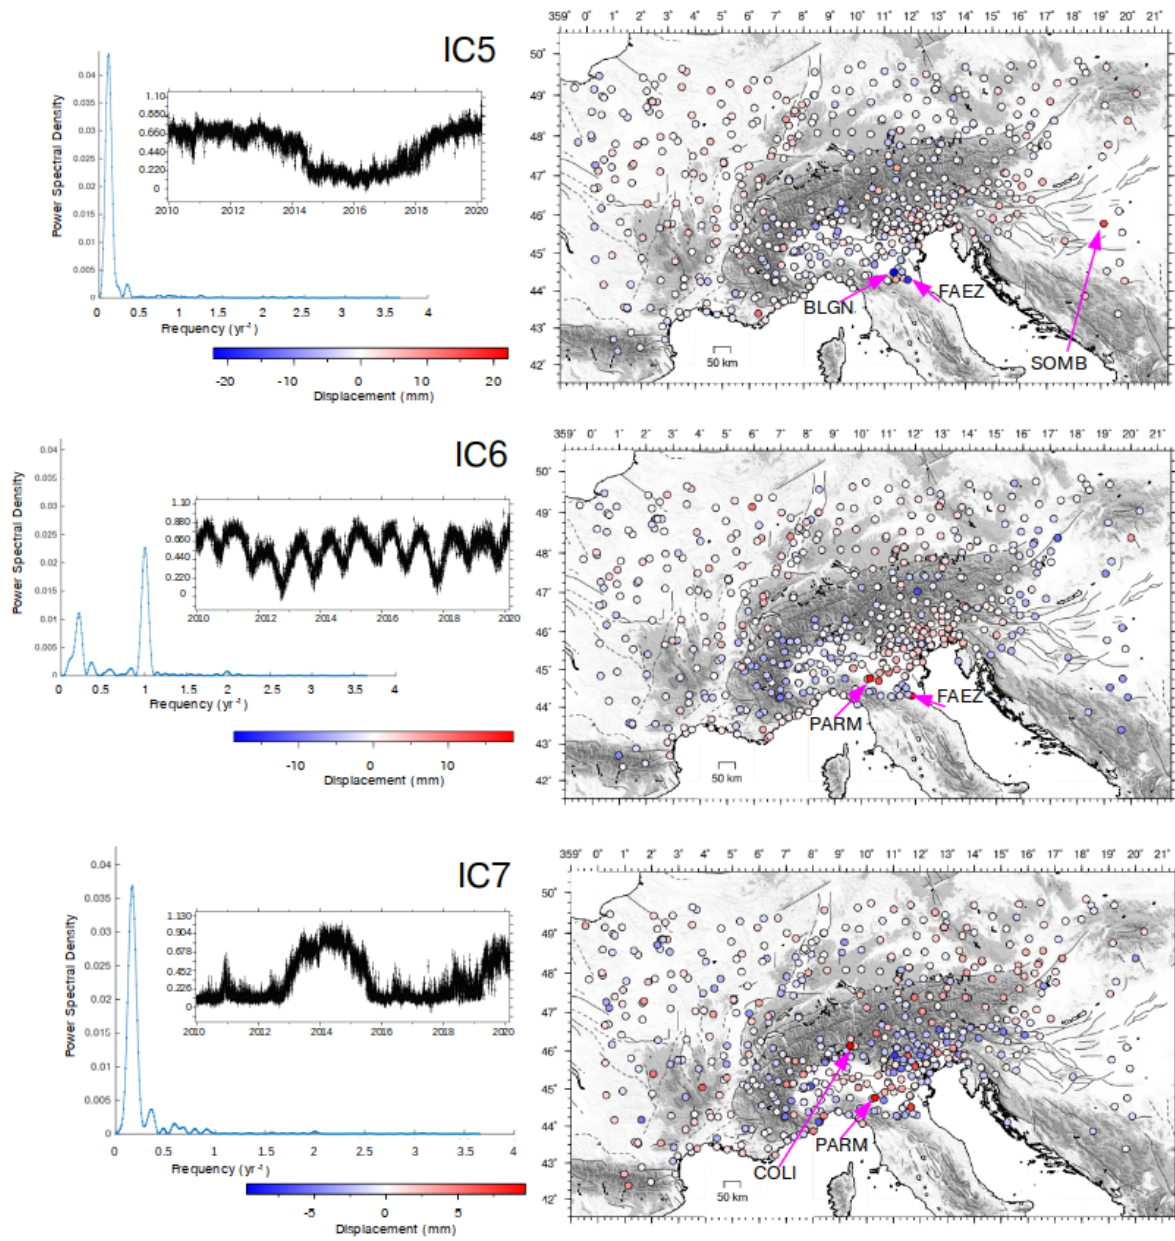

Figure S14. Temporal evolution and spatial response of IC5, IC6, IC7.



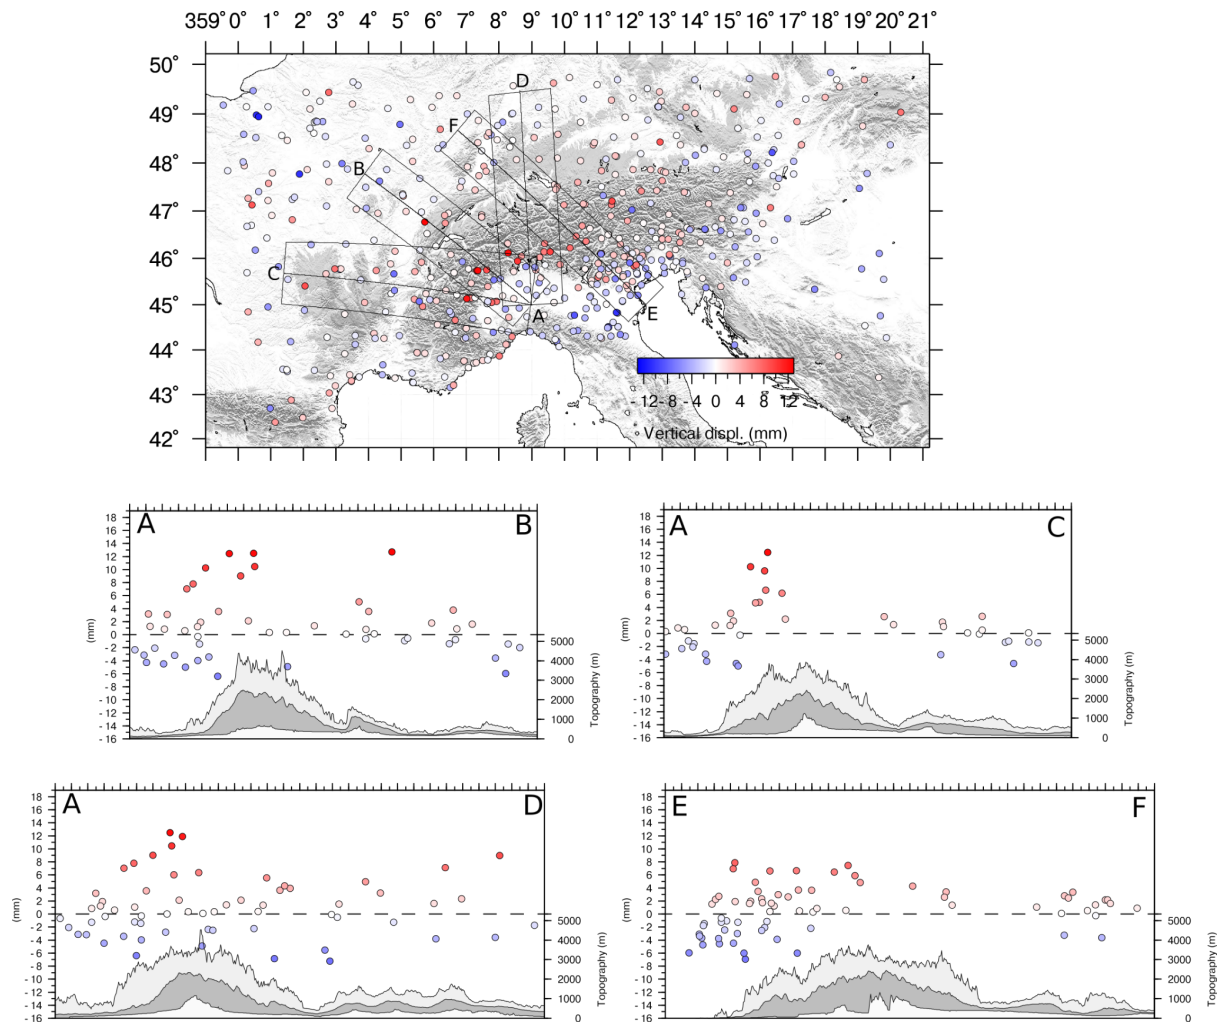

**Figure S15. Cross sections showing the maximum displacements associated with IC4 across the Alps during the time interval that goes from summer 2015 to winter 2016 (see also Fig. 9).**

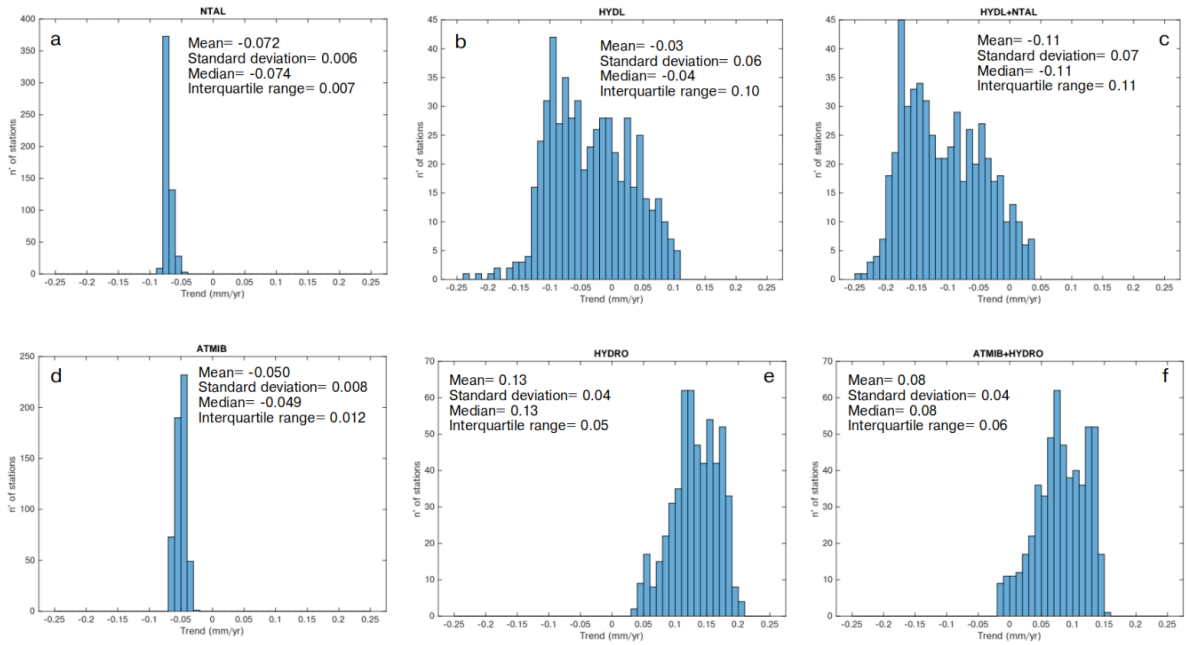

**Figure S16. Histogram of the trend of: a) NTAL; b) HYDL; c) NTAL+HYDL; d) ATMIB; e) HYDRO; f) ATMIB+HYDRO.**

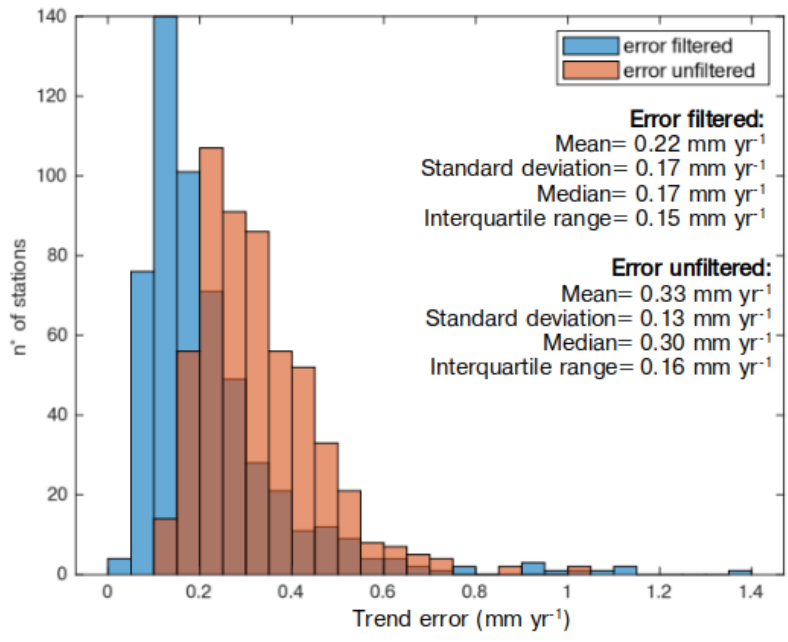

**Figure S17. Histogram of the error associated with the trend of the filtered (blue) and unfiltered (orange) time series.**

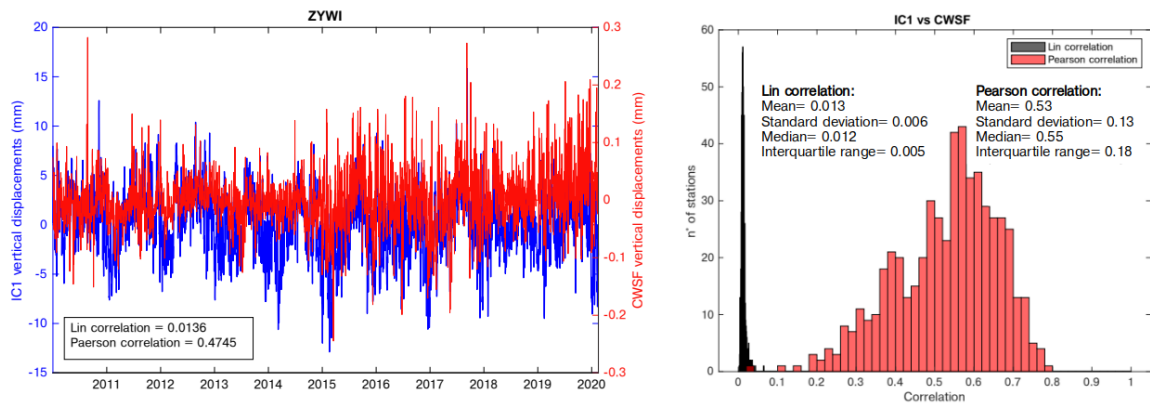

**Figure S18.** Comparison between the displacement associated with IC1 (in blue) at the ZYWI site and the CME estimated with the Correlation Weighted Stacking Filtering Method (in red). We also show the histogram representing the Lin (in black) and Pearson (in red) correlation between the displacements associated with the IC1 and the CME estimated with the Correlation Weighted Stacking Filtering Method at each site.

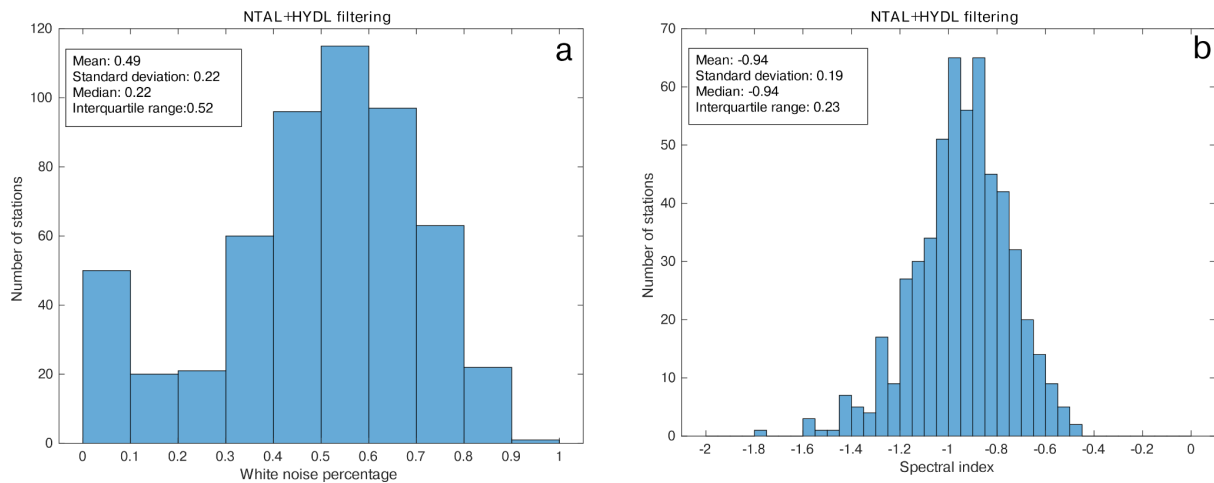

**Figure S19.** Histograms of: (a) white noise percentage and (b) spectral index in the filtered time series. The filtering is done by subtracting the displacements due to HYDL+NTAL from IGB14-time series.



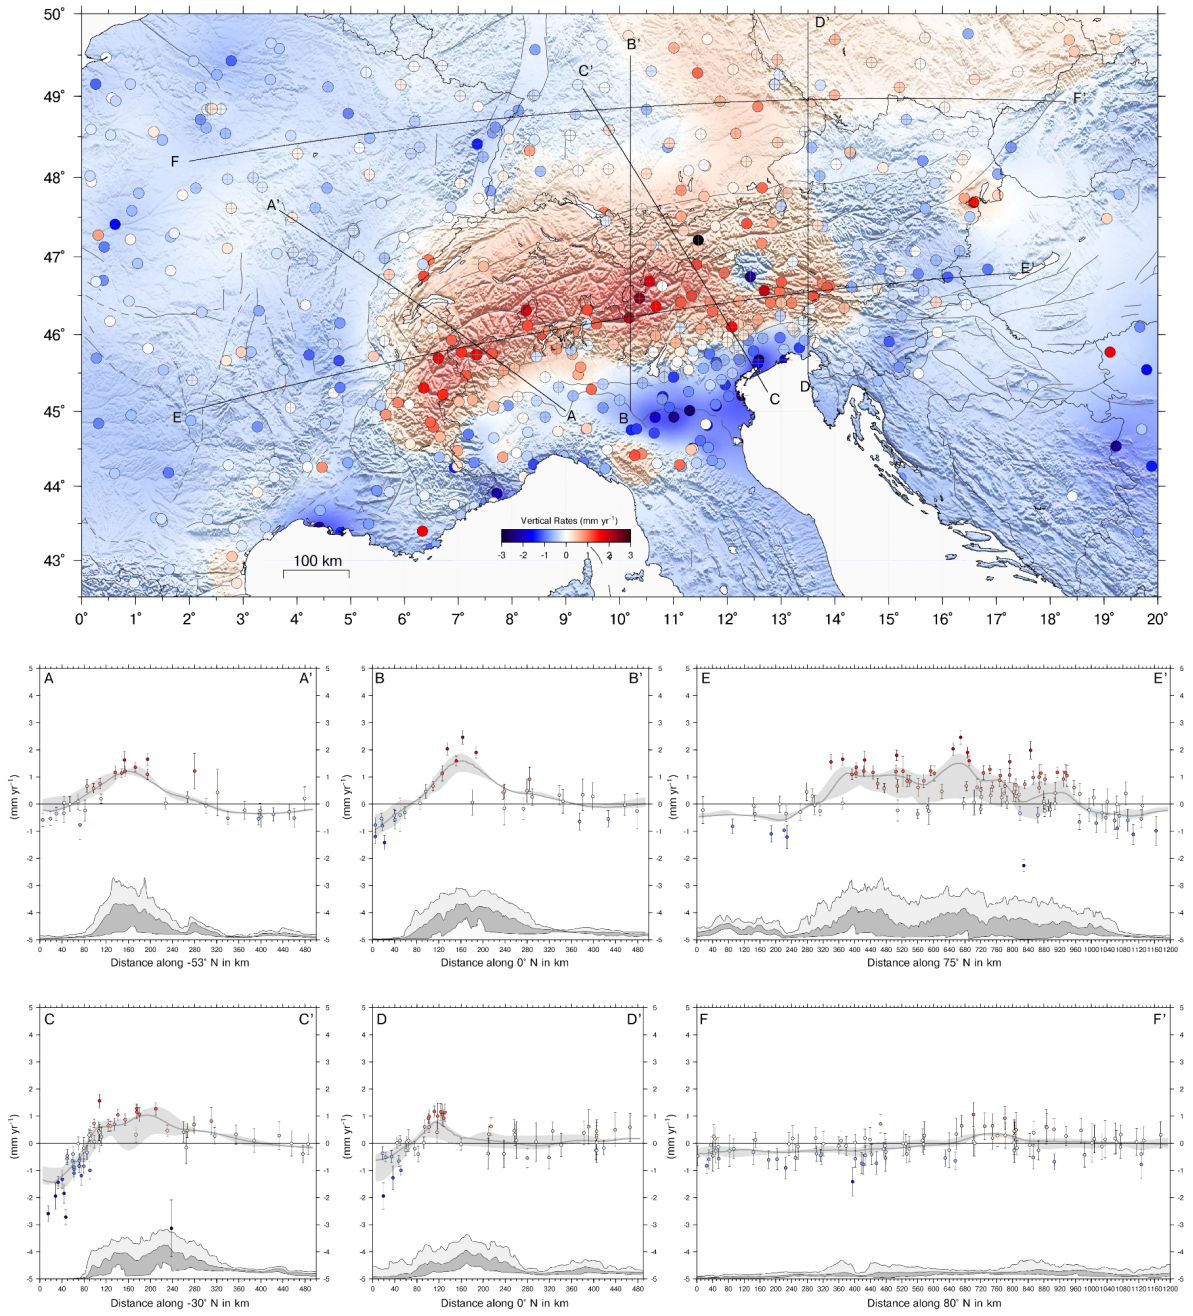

**Figure S20. Vertical velocities from unfiltered time-series (colored circles), continuous velocity field, topographic and swath profiles across the great Alpine area. Each profile encompasses a 100 km swath.**

## References

- Boehm, J., Mendes Cerveira, P. J., Schuh, H., and Tregoning, P.: The impact of mapping functions for the neutral atmosphere based on numerical weather models in GPS data analysis, IAG Symop. Ser., vol. 130, edited by P. Tregoning and C. Rizos, pp. 837–843, Springer, New York, 2007.
- Dong, D., Herring, T. A. and King, R. W.: Estimating regional deformation from a combination of space and terrestrial geodetic data. *J Geod* 72:200–214. <https://doi.org/10.1007/s001900050161>, 1998.
- Herring, T. A., King, R. W., Floyd, M. A. and McClusky, S. C.: Introduction to GAMIT/GLOBK, Release 10.7. Retrieved from [http://geoweb.mit.edu/gg/Intro\\_GG.pdf](http://geoweb.mit.edu/gg/Intro_GG.pdf), 2018.
- Lyard, F., Lefèvre, F., Letellier, T. and Francis, O.: Modelling the global ocean tides: Modern insights from FES2004. *Ocean Dynam* 56(5-6):394-415, <https://doi.org/10.1007/s10236-006-0086-x>, 2006.
- Petrie, E. J., King, M. A., Moore, P. and Lavallée, D. A.: Higher-order ionospheric effects on the GPS reference frame and velocities. *J. Geophys. Res. Solid Earth*, 115(B3), <http://dx.doi.org/10.1029/2009JB006677>, 2010.
